# Supplementary material for: Synthesis of PEVE-b-P(CTFE-alt-EVE) block copolymers by sequential cationic and radical RAFT polymerization
Source: Royal Society of Chemistry journal article supplement (doi:10.1039/c7py01924f), 2017-12-08
Supplement: c7py01924f1.pdf [file c7py01924f1.pdf]

## Supporting Information

### Synthesis of PEVE-*b*-P(CTFE-*alt*-EVE) block copolymers by sequential cationic and radical RAFT polymerization

Marc Guerre,<sup>a,†</sup> Mineto Uchiyama,<sup>b</sup> Gerald Lopez,<sup>a</sup> Bruno Améduri,<sup>a</sup> Kotaro Satoh,<sup>bc</sup> Masami Kamigaito,<sup>b\*</sup> and Vincent Ladmiral<sup>a\*</sup>

<sup>a</sup>ICGM, University of Montpellier, CNRS, ENSCM, Montpellier, France. 240 av du Professeur Emile Jeanbrau, 34296 Cedex 5 Montpellier, France.

<sup>b</sup>Department of Molecular and Macromolecular Chemistry, Graduate School of Engineering, Nagoya University, Furo-cho, Chikusa-ku, Nagoya 464-8603, Japan.

<sup>c</sup>Precursory Research for Embryonic Science and Technology, Japan Science and Technology Agency, 4-1-8 Honcho, Kawaguchi, Saitama 332-0012, Japan.

† Department of Organic and Macromolecular Chemistry, Polymer Chemistry Research Group, Ghent University, Krijgslaan 281, B-9000, Ghent, Belgium.

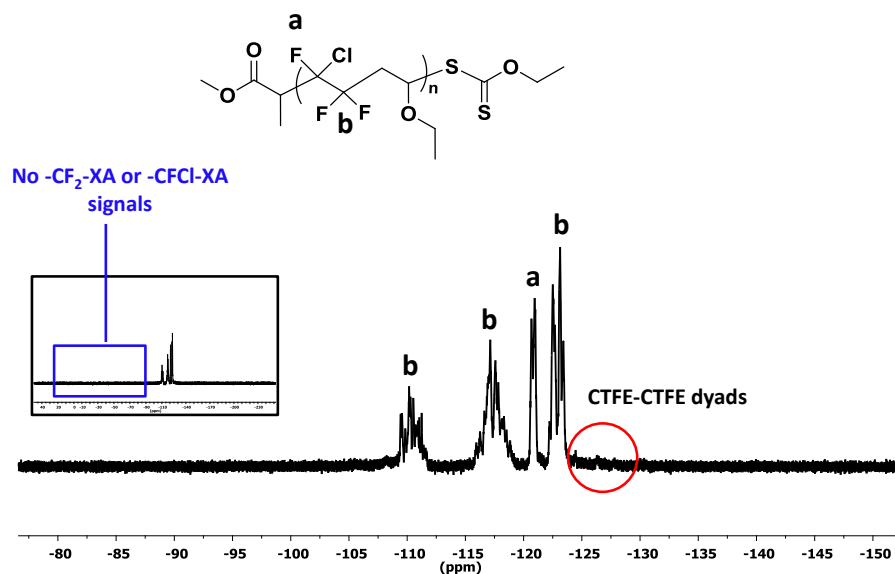

**Figure S1.**  $^{19}\text{F}$  NMR spectrum in  $\text{CDCl}_3$  of  $\text{P}(\text{CTFE-}i\text{alt-EVE})\text{-XA}$  homopolymer (P1, Table 1) synthesized by RAFT alternating copolymerization of CTFE and EVE via pathway 1.

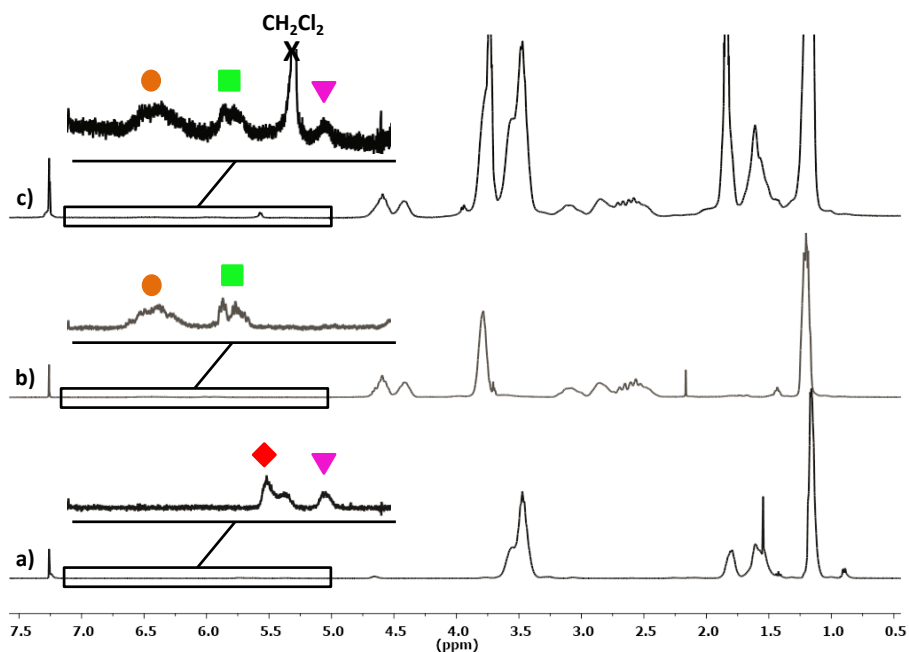

**Figure S2.**  $^1\text{H}$  NMR spectra in  $\text{CDCl}_3$  of: a)  $\text{PEVE}_3$  homopolymer synthesized by RAFT cationic polymerization of EVE (P4, Table 1); b)  $\text{P}(\text{CTFE-}i\text{alt-EVE})\text{-XA}$  homopolymer synthesized by radical RAFT alternating copolymerization of CTFE and EVE (P1, Table 1); and c)  $\text{P}(\text{CTFE-}i\text{alt-EVE})\text{-}b\text{-PEVE}$  block copolymers synthesized using pathway 1 (first radical RAFT polymerization followed by cationic RAFT polymerization (P5, Table 1). The expanded regions show the polymer end-groups:  $\text{PEVE-CH}_2\text{-CH}(\text{OEt})\text{-XA}$  (red diamond), internal C-C double bond generated by partial abstraction of the ethyloxy group during cationic polymerization (purple triangle),  $\text{P}(\text{CTFE-}i\text{alt-EVE})\text{-CFClH}$  (orange circle),  $\text{P}(\text{CTFE-}i\text{alt-EVE})\text{-CH}_2\text{-CH}(\text{OEt})\text{-XA}$  (green square).

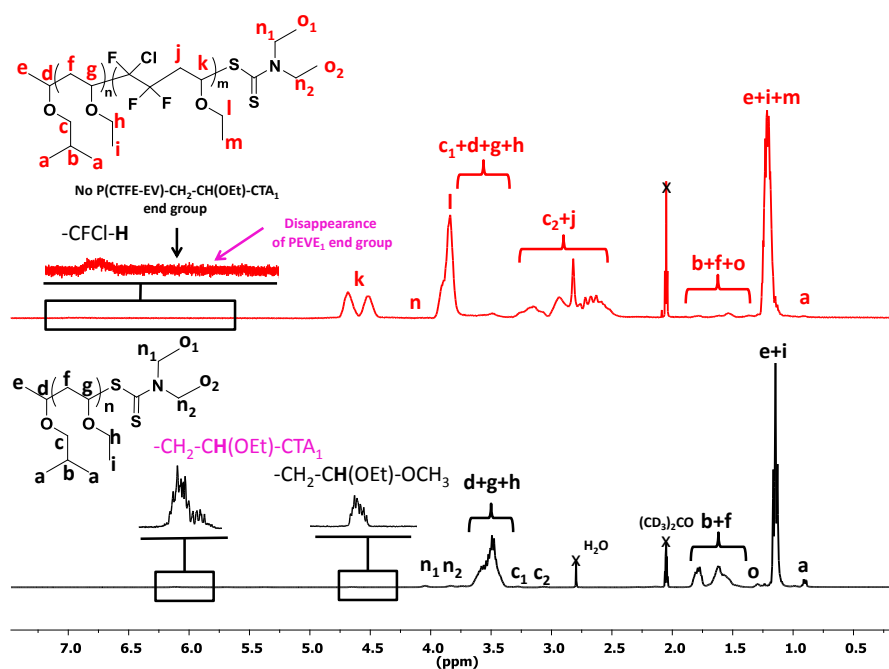

**Figure S3.**  $^1\text{H}$  NMR spectra in  $(\text{CD}_3)_2\text{CO}$  of: (bottom)  $\text{PEVE}_1$  homopolymer (P2, Table 1); (top)  $\text{PEVE}_1\text{-}b\text{-P}(\text{CTFE-}a\text{-}l\text{-}t\text{-EVE})\text{-CTA}_1$  block copolymer (P6, Table 1) synthesized via pathway 2 (first RAFT cationic polymerization followed by RAFT cationic polymerization).

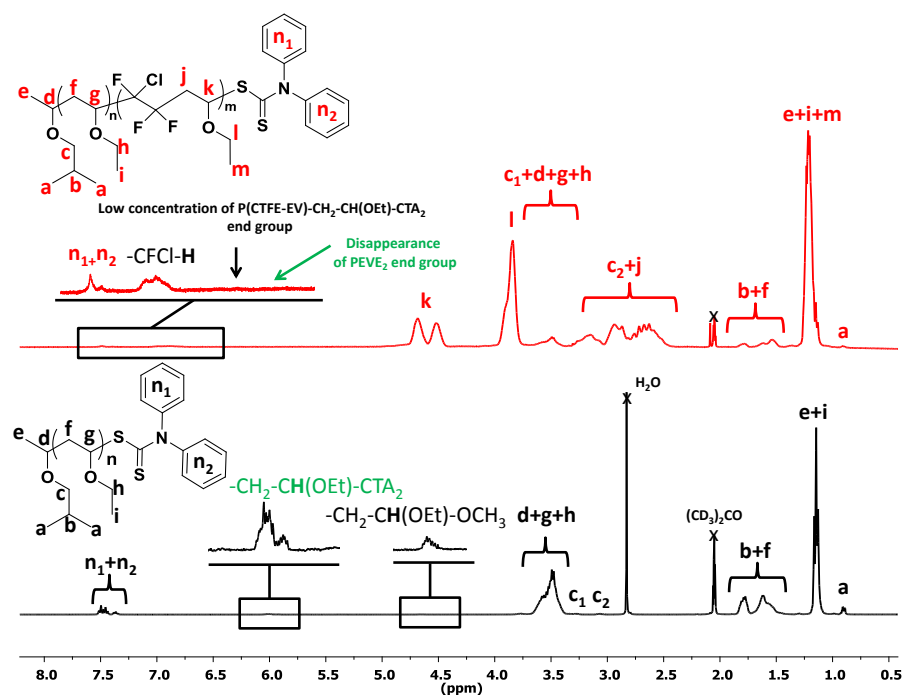

**Figure S4.**  $^1\text{H}$  NMR spectra in  $(\text{CD}_3)_2\text{CO}$  of: (bottom)  $\text{PEVE}_2$  homopolymer (P3, Table 1) and  $\text{PEVE}_2\text{-}b\text{-P}(\text{CTFE-}a\text{-}l\text{-}t\text{-EVE})\text{-CTA}_2$  block copolymer (P7, Table 1) synthesized via pathway 2 (first cationic RAFT polymerization followed by radical RAFT copolymerization).

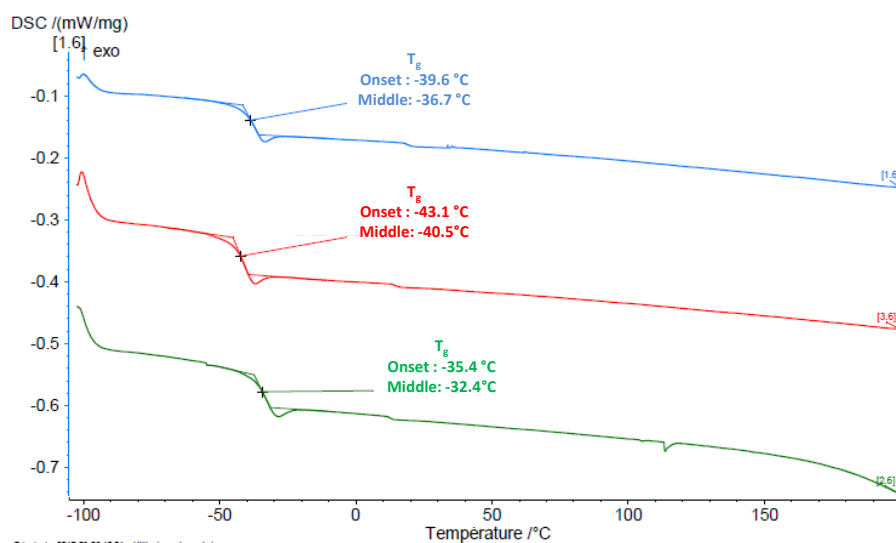

**Figure S5.** DSC thermograms of PEVE<sub>1</sub> (P2, Table 1, blue line), PEVE<sub>2</sub> (P3 Table 1, red line) and PEVE<sub>3</sub> (P4 Table 1, green line).

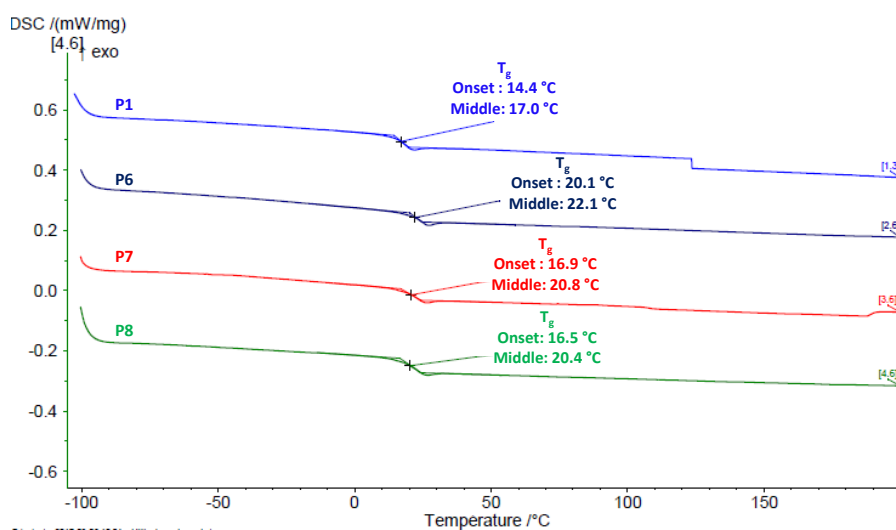

**Figure S6.** DSC thermograms of P(CTFE-*alt*-EVE)-XA (P1, Table 1, blue line), PEVE-*b*-P(CTFE-*alt*-EVE)-CTA<sub>1</sub> (P6, Table 1, dark blue line), PEVE-*b*-P(CTFE-*alt*-EVE)-CTA<sub>2</sub> (P7, Table 1, red line) and PEVE-*b*-P(CTFE-*alt*-EVE)-CTA<sub>3</sub> (P8, Table 1, green line).

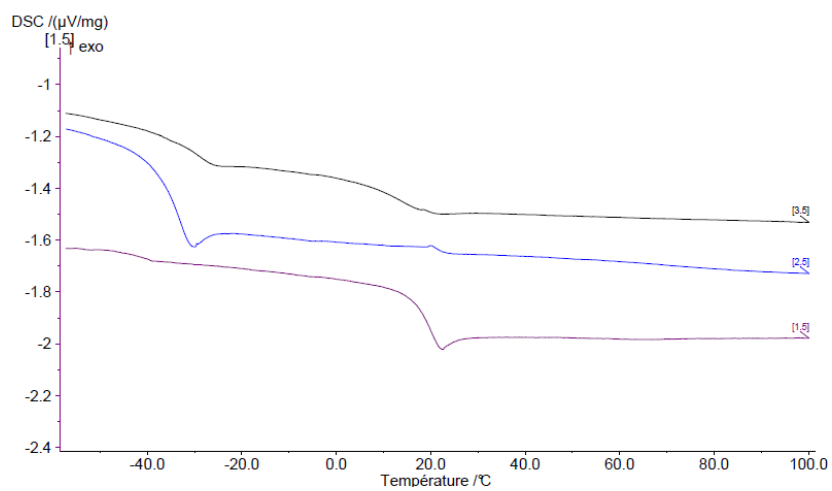

**Figure S7.** DSC thermograms of PEVE<sub>1</sub> (P2, Table 1, blue line), P(CTFE-*alt*-EVE)-XA (P1, Table 1, purple line) and blend of both (PEVE<sub>1</sub> and P(CTFE-*alt*-EVE)-XA, respectively P2 and P1 in Table 1)

#### References

- <sup>1</sup> A. Kanazawa, S. Kanaoka, S. Aoshima, *J. Polym. Sci: Part A: Polym. Chem.* **2010**, 48, 3702-3708
